# Supplementary material for: Predicting dementia from primary care records: A systematic review and meta-analysis
Source: PubMed Central journal article supplement (PMC5875793; doi:10.1371/journal.pone.0194735), 2018-03-29

- Figure 1: Forest plot of comparison: Obesity, outcome: Dementia NOS
- Figure 2: Forest plot of comparison: Obesity, outcome: Alzheimer's
- Figure 3: Forest Plot of comparison: Smoker, outcome: Dementia NOS
- Figure 4: Forest plot of comparison: Smoker, outcome: Alzheimer's
- Figure 5: Forest plot of comparison: Depression, outcome: Dementia NOS
- Figure 6: Forest plot of comparison: Depression, outcome: Alzheimer's
- Figure 7: Forest plot of comparison: Ischaemic Heart Disease, outcome: Dementia NOS
- Figure 8: Forest Plot of comparison: Hypertension, outcome: Dementia NOS
- Figure 9: Forest plot of comparison: Hypertension, outcome: Alzheimer's
- Figure 10: Forest plot of comparison: Stroke, outcome: Dementia NOS
- Figure 11: Forest plot of comparison: Dyslipidaemia, outcome: Dementia NOS
- Figure 12: Forest plot of comparison: Dyslipidaemia, outcome: Alzheimer's NOS
- Figure 13: Forest plot of comparison: Atrial Fibrillation, outcome: Dementia NOS
- Figure 14: Forest plot of comparison: Heart Failure, outcome: Dementia NOS
- Figure 15: Forest plot of comparison: Diabetes, outcome: Dementia NOS.
- Figure 16: Forest plot of comparison: Diabetes, outcome: Alzheimer's
- Figure 17: Forest plot of comparison: Inflammatory conditions, incl bowel, outcome: Dementia NOS
- Figure 18: Forest plot of comparison: Lipid lowering drugs + statins, outcome: Dementia NOS
- Figure 19: Forest plot of comparison: Anti-hypertensive drugs, outcome: Dementia NOS

Figure 1: Forest plot of comparison: Obesity, outcome: Dementia NOS

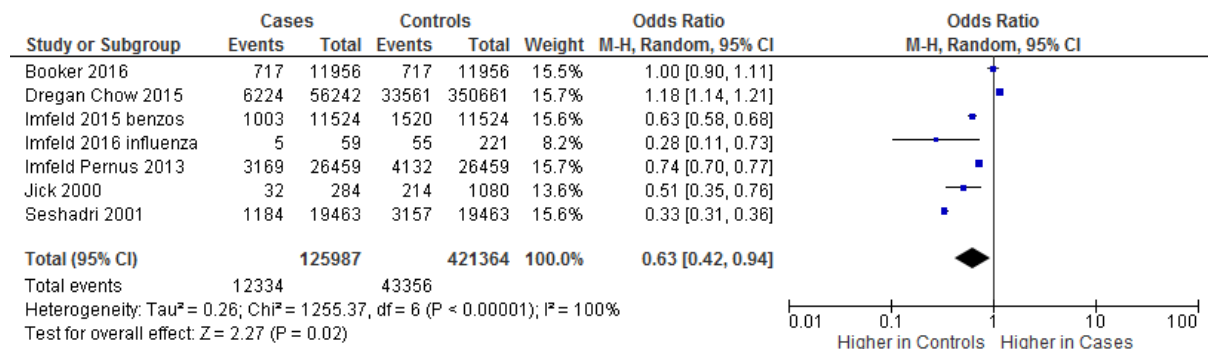

Figure 2: Forest plot of comparison: Obesity, outcome: Alzheimer's

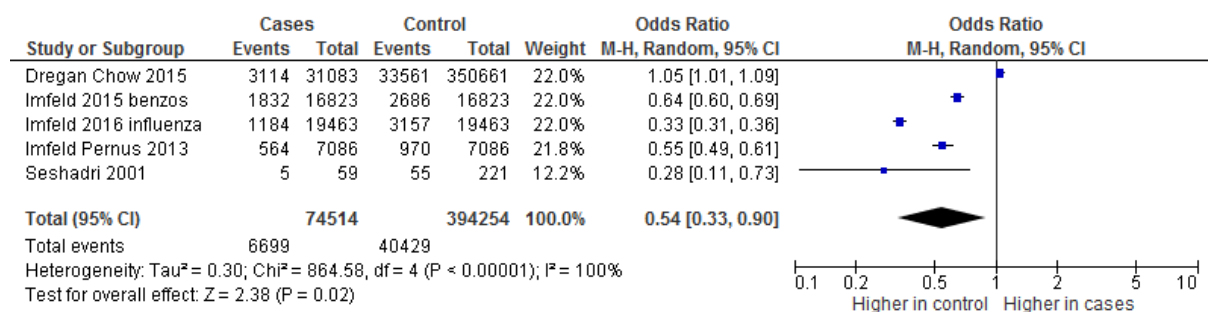

Figure 3: Forest Plot of comparison: Smoker, outcome: Dementia NOS

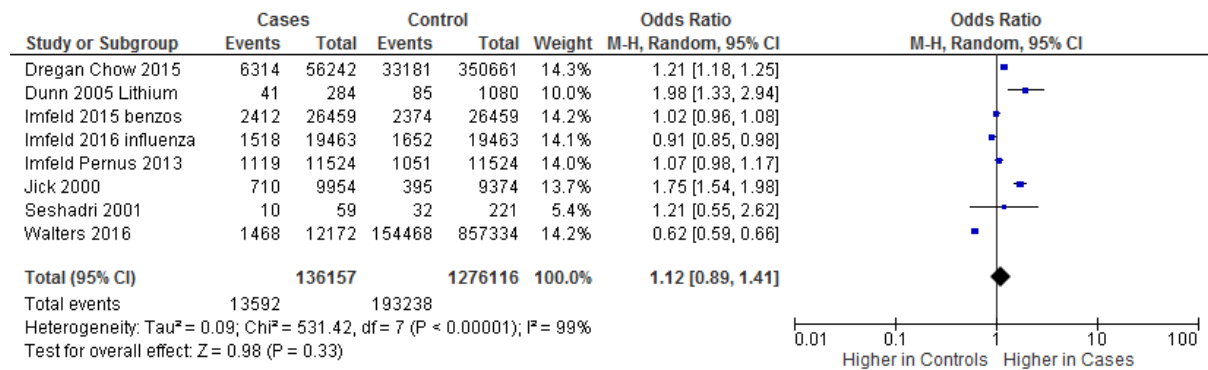

Figure 4: Forest plot of comparison: Smoker, outcome: Alzheimer's

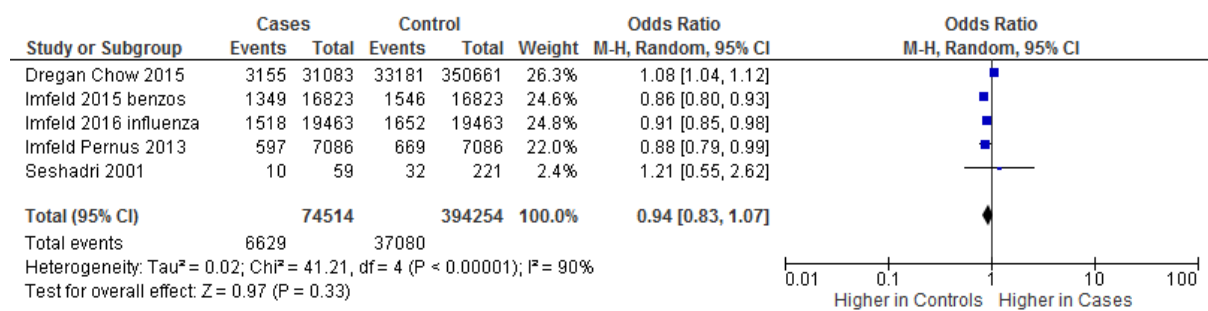

Figure 5: Forest plot of comparison: Depression, outcome: Dementia NOS

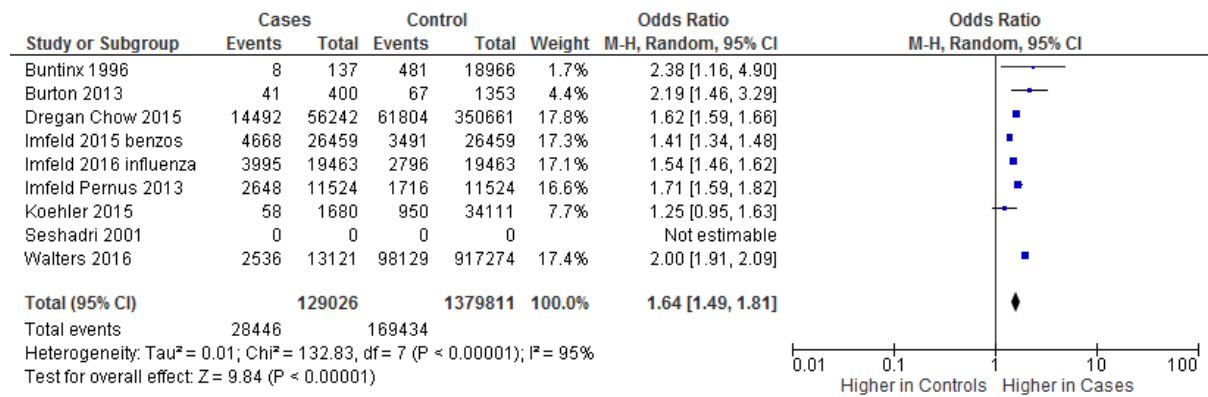

Figure 6: Forest plot of comparison: Depression, outcome: Alzheimer's

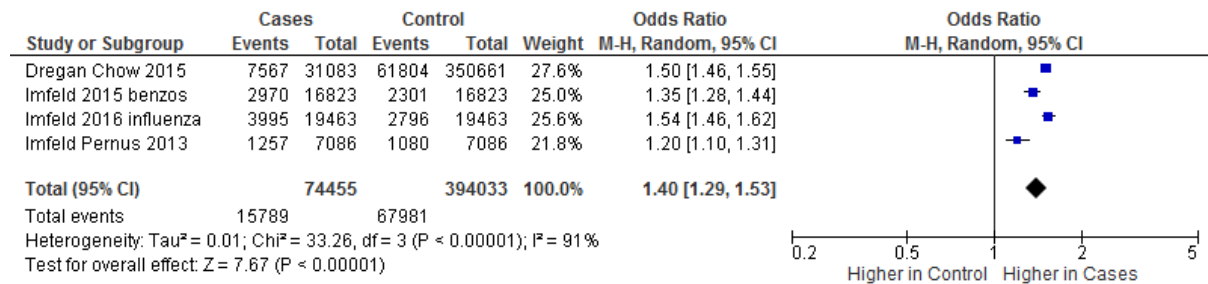

Figure 7: Forest plot of comparison: Ischaemic Heart Disease, outcome: Dementia NOS

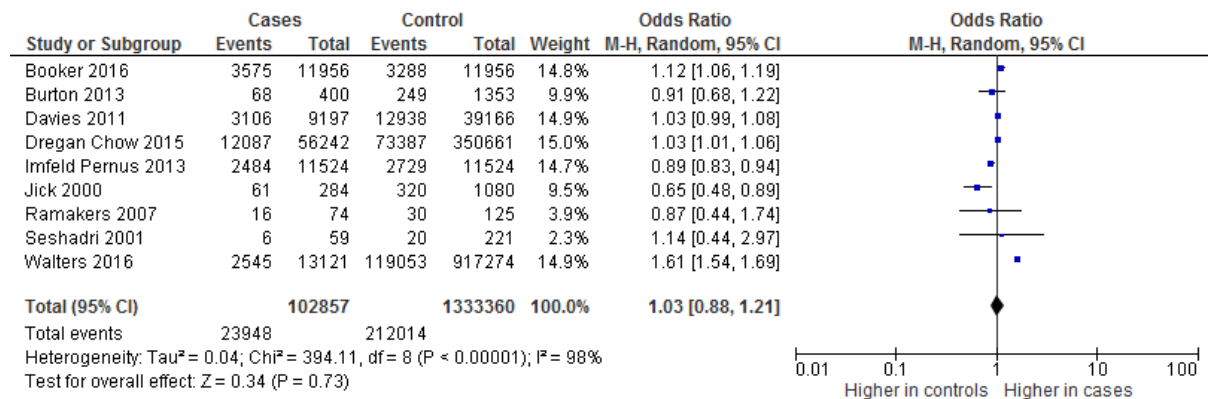

Figure 8: Forest Plot of comparison: Hypertension, outcome: Dementia NOS

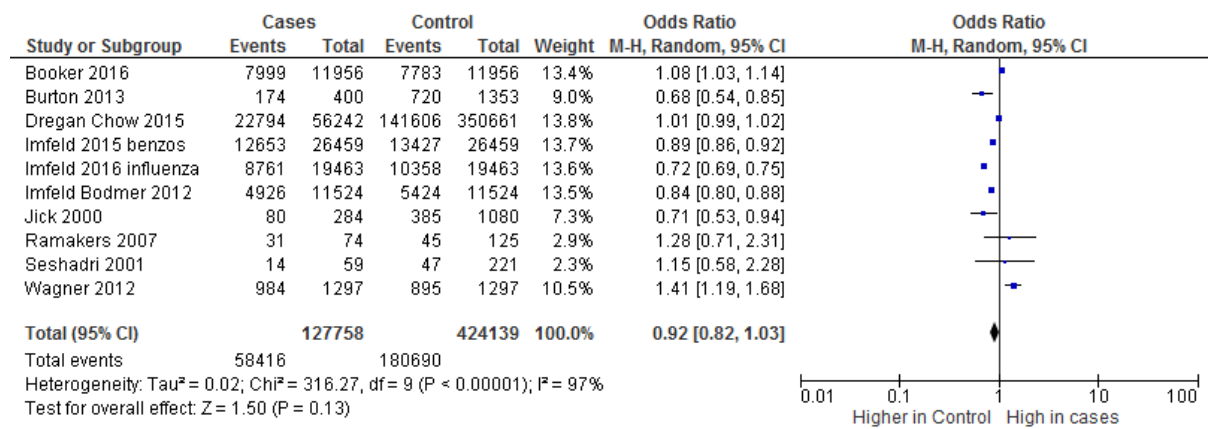

Figure 9: Forest plot of comparison: Hypertension, outcome: Alzheimer's

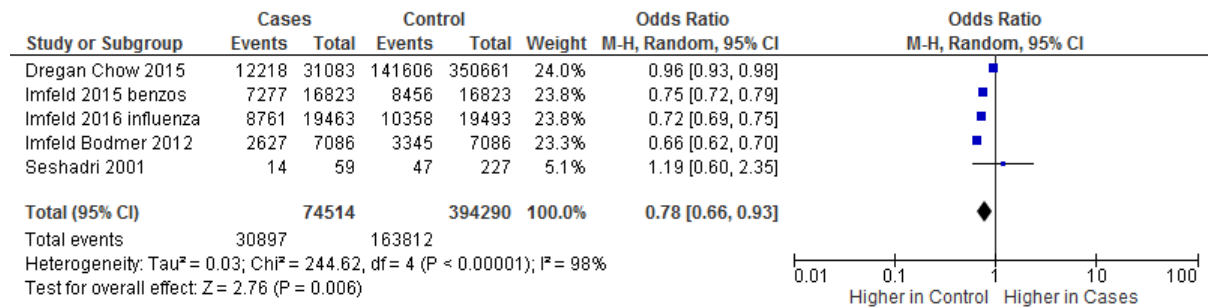

Figure 10: Forest plot of comparison: Stroke, outcome: Dementia NOS

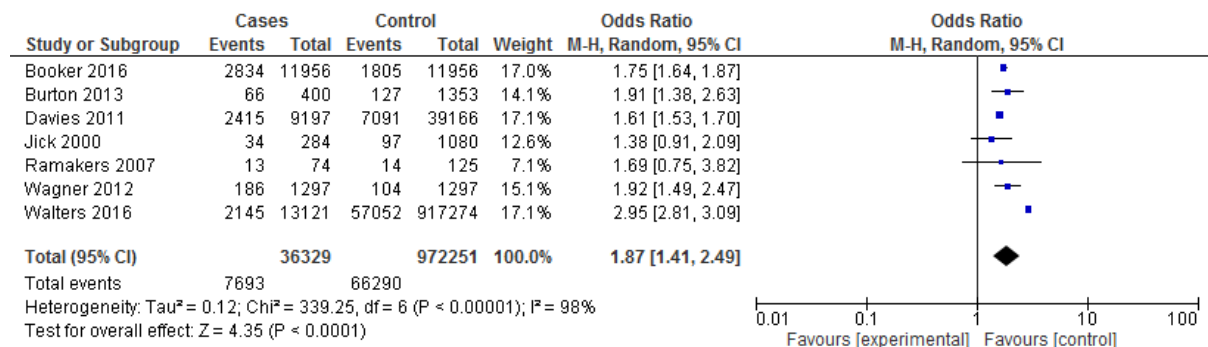

Figure 11: Forest plot of comparison: Dyslipidaemia, outcome: Dementia NOS

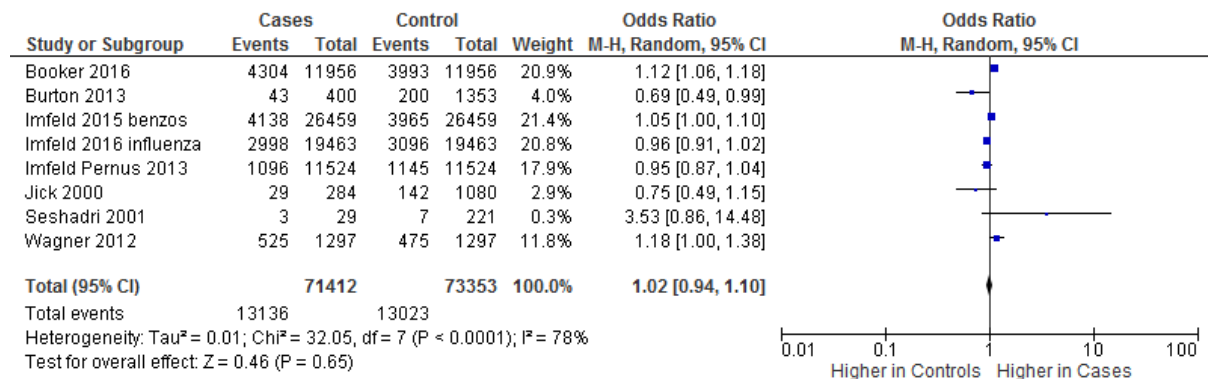

Figure 12: Forest plot of comparison: Dyslipidaemia, outcome: Alzheimer's NOS

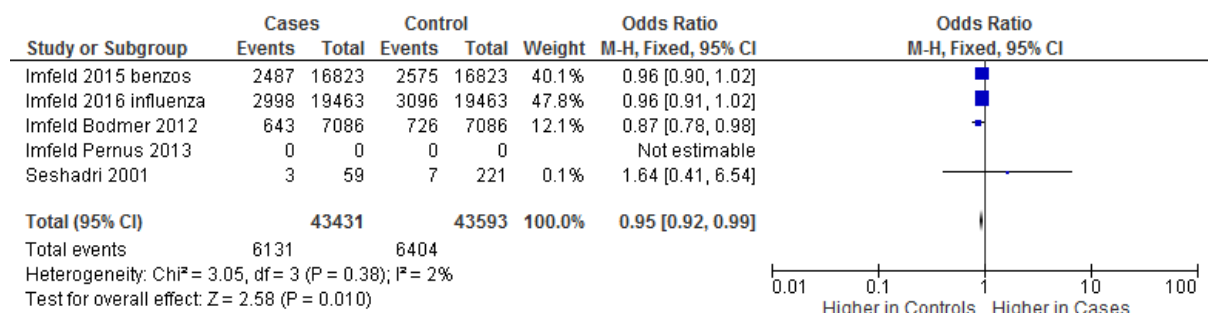

Figure 13: Forest plot of comparison: Atrial Fibrillation, outcome: Dementia NOS

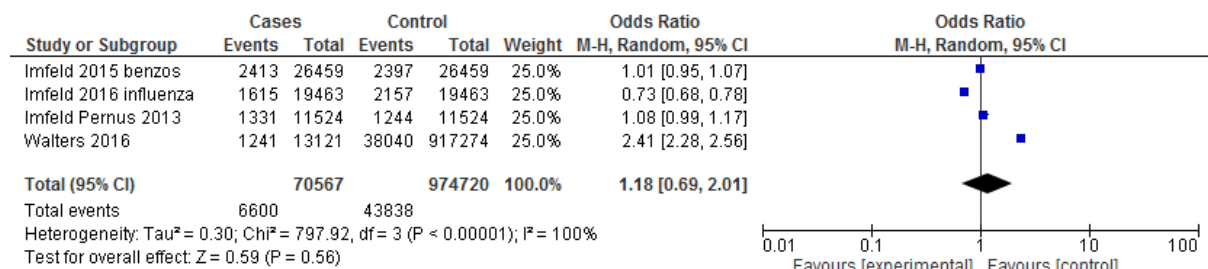

Figure 14: Forest plot of comparison: Heart Failure, outcome: Dementia NOS

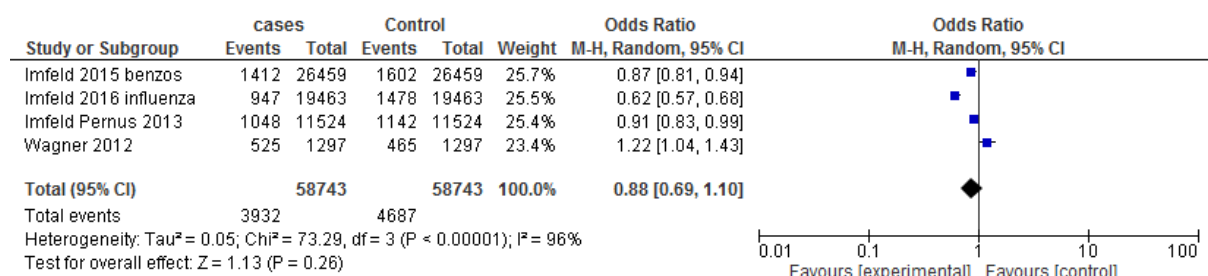

Figure 15: Forest plot of comparison: Diabetes, outcome: Dementia NOS.

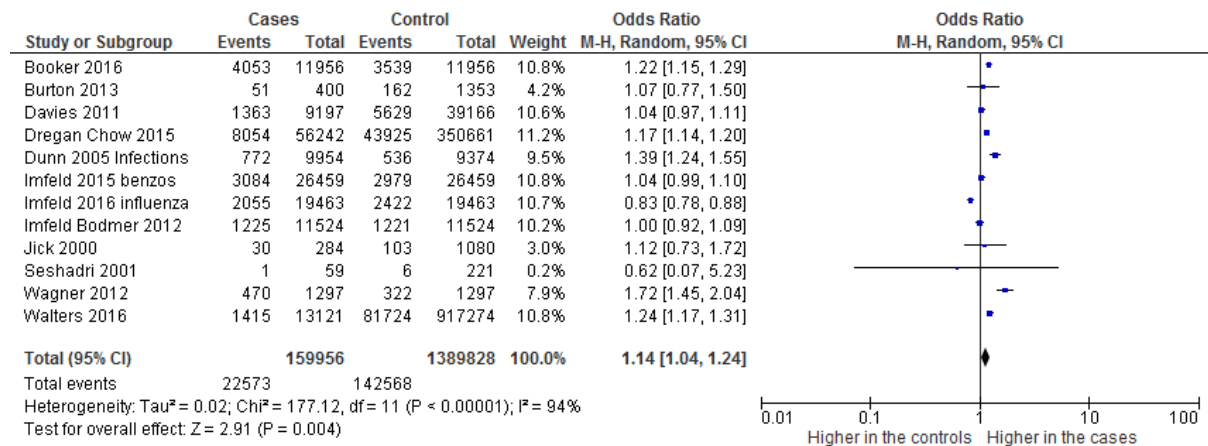

Figure 16: Forest plot of comparison: Diabetes, outcome: Alzheimer's

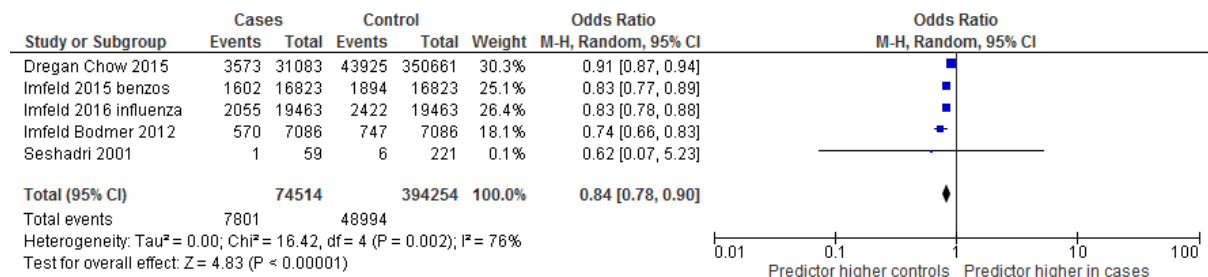

Figure 17: Forest plot of comparison: Inflammatory conditions, incl bowel, outcome: Dementia NOS

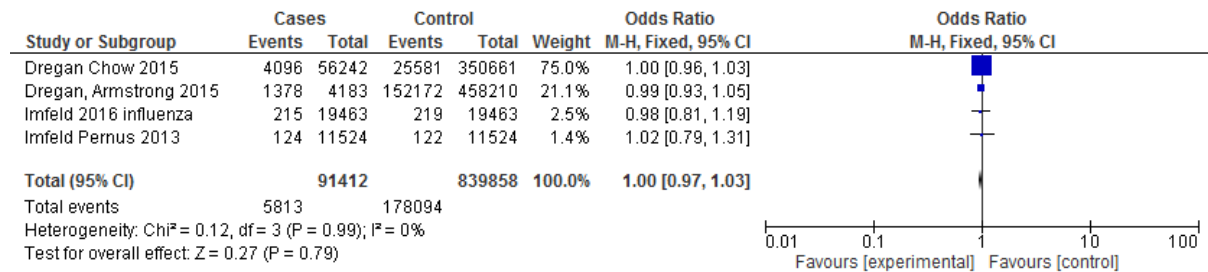

Figure 18: Forest plot of comparison: Lipid lowering drugs + statins, outcome: Dementia NOS

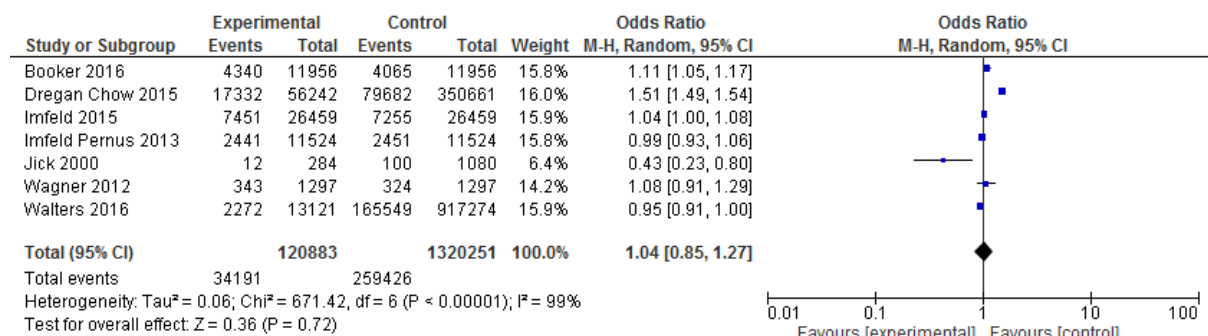

Figure 19: Forest plot of comparison: Anti-hypertensive drugs, outcome: Dementia NOS

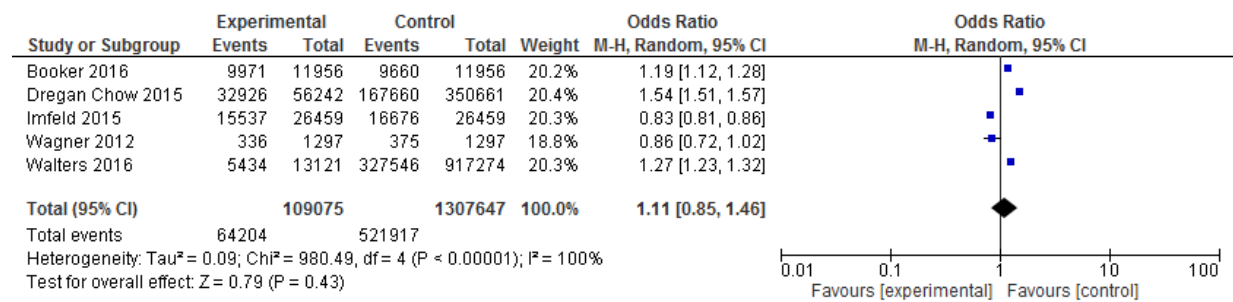

Supplement: pone.0194735.s002.pdf [file pone.0194735.s002.pdf]
