# Supplementary material for: Predicting dementia from primary care records: A systematic review and meta-analysis
Source: PubMed Central journal article supplement (PMC5875793; doi:10.1371/journal.pone.0194735), 2018-03-29

Figure 1: Forest Plot of comparison: Obesity, outcome: Dementia

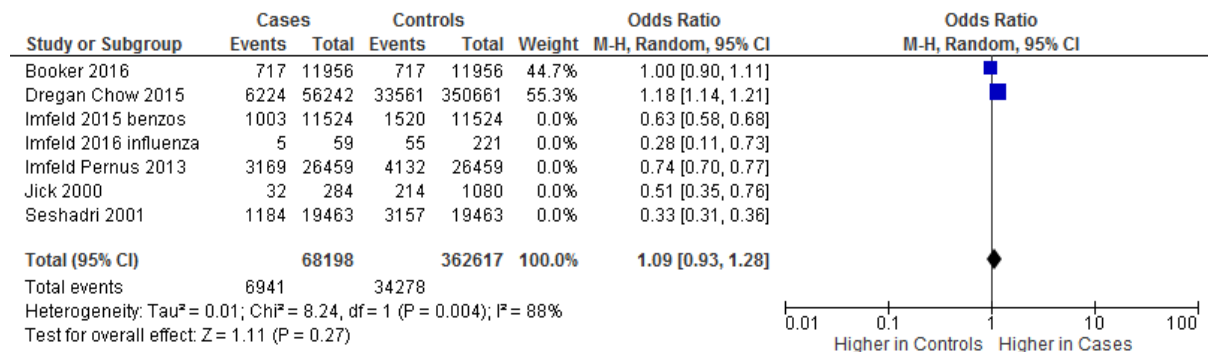

Figure 2: Forest Plot of comparison: Smoker, outcome: Dementia

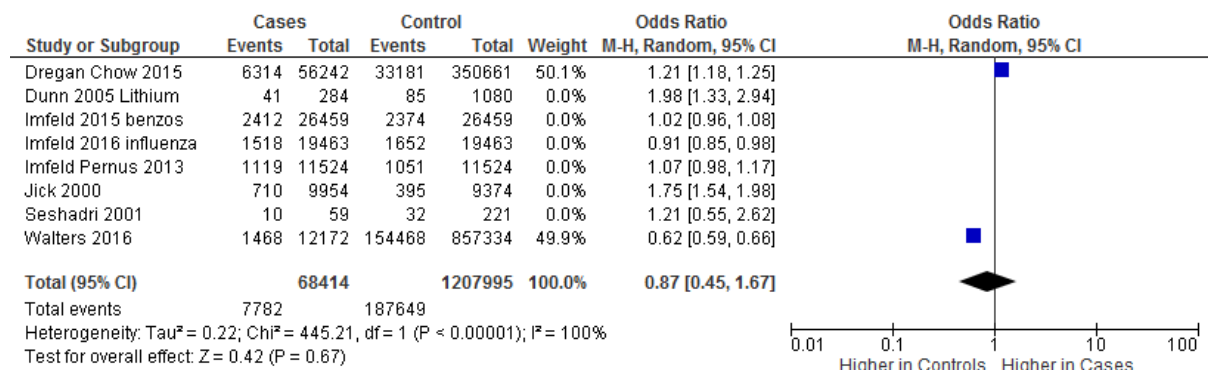

Figure 3: Forest plot of comparison: Depression, outcome: Dementia

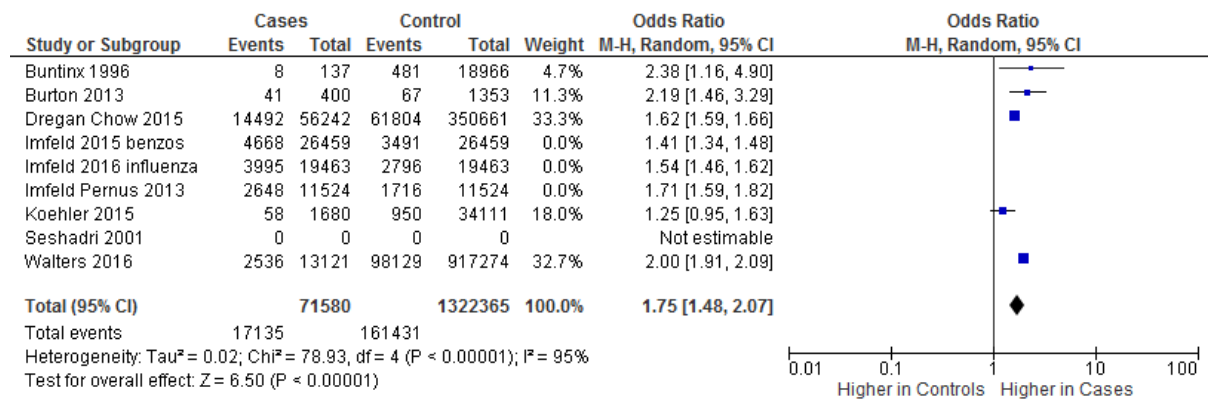

Figure 4: Forest plot of comparison: Coronary Heart Disease, outcome: Dementia

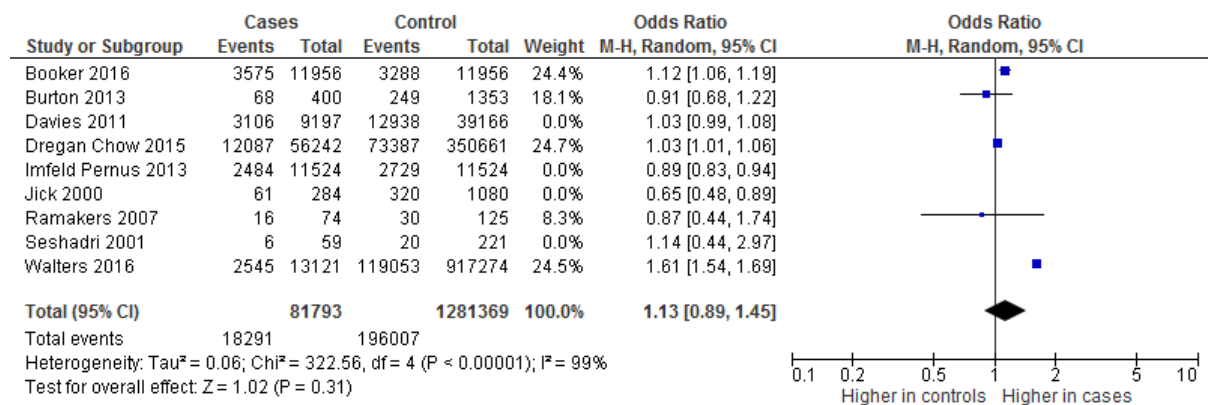

Figure 5: Forest plot of comparison: Hypertension, outcome: Dementia

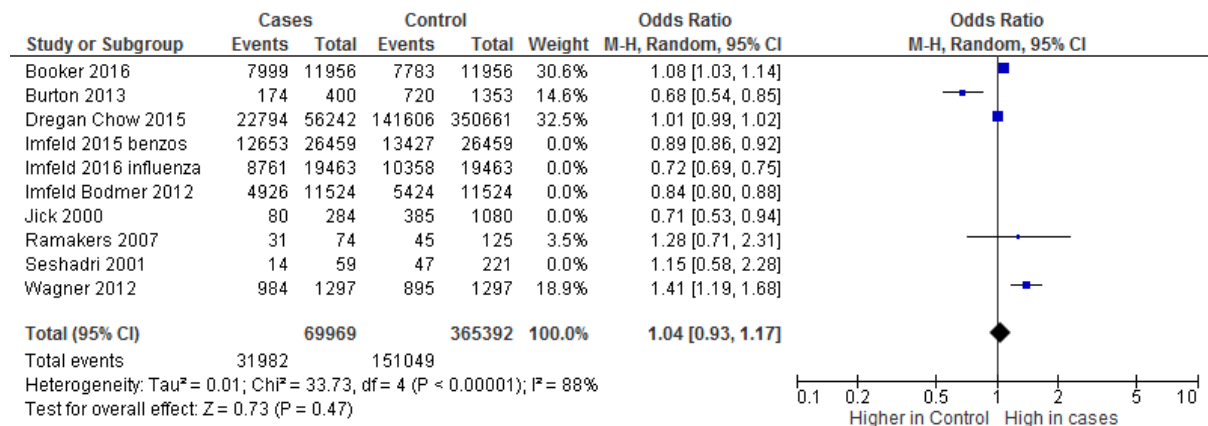

Figure 6: Forest plot of comparison: Dyslipidemia, outcome: Dementia

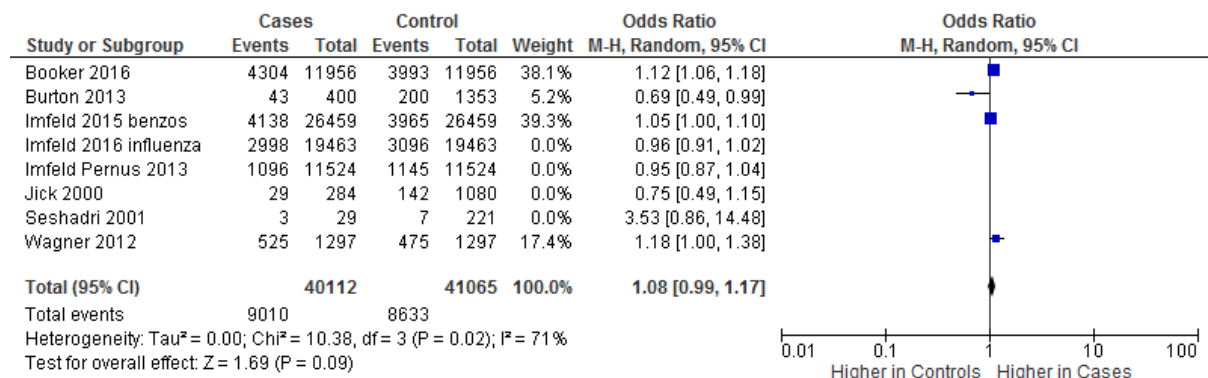

Figure 7: Forest plot of comparison: Atrial Fibrillation, outcome: Dementia

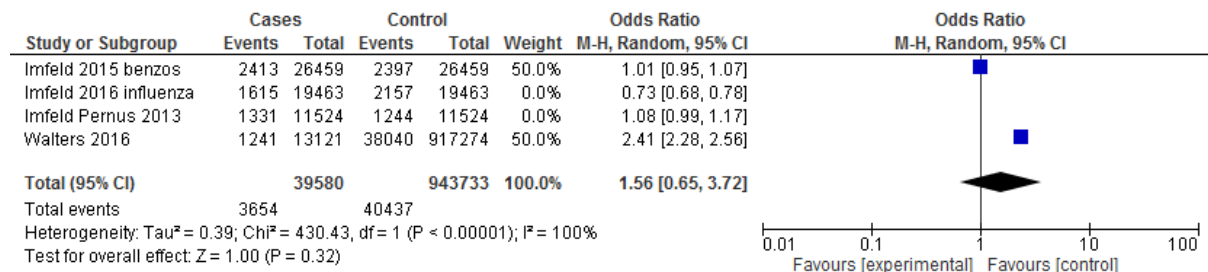

Figure 8: Forest plot of comparison: Heart Failure, outcome: Dementia

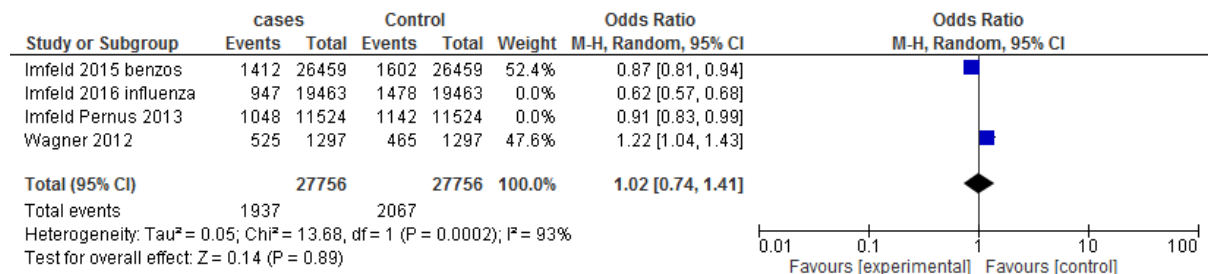

Figure 9: Forest plot of comparison: Diabetes, outcome: Dementia

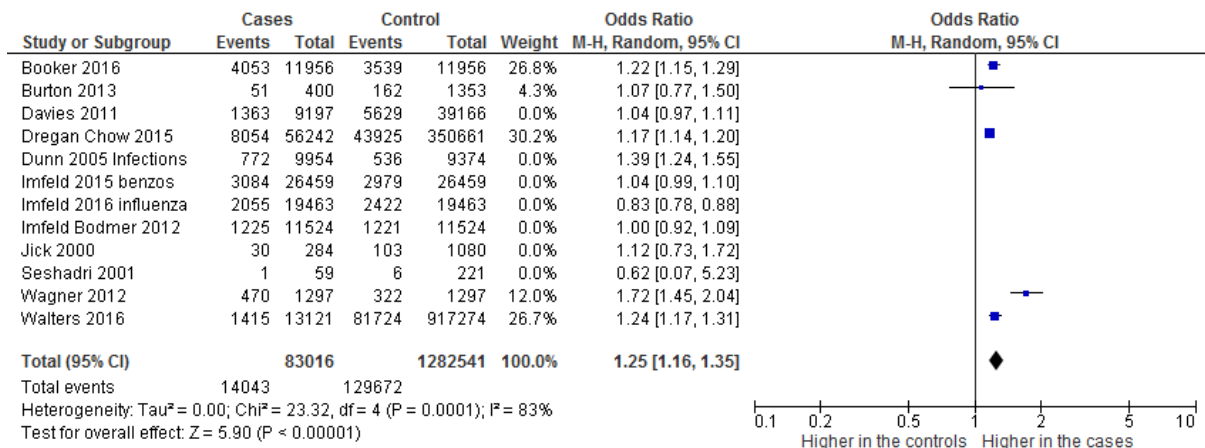

Figure 10: Forest plot of comparison: COPD, outcome: Dementia

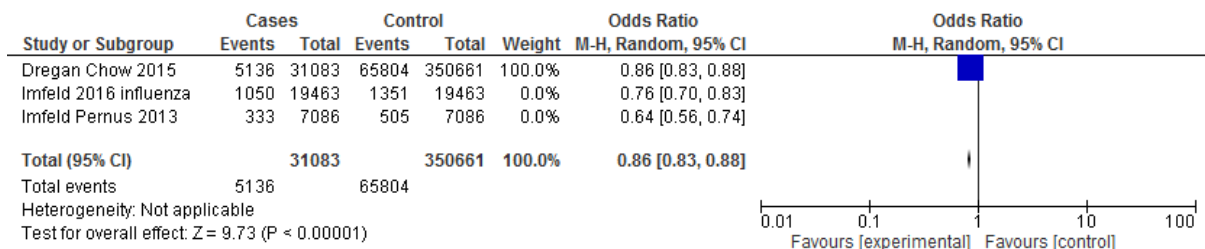

Figure 11: Forest plot of comparison: Inflammatory Conditions, outcome: Dementia

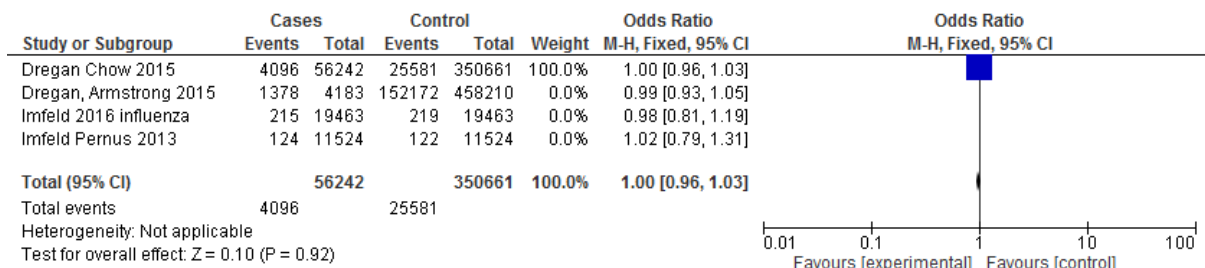

Figure 12: Forest plot of comparison: Statins, outcome: Dementia

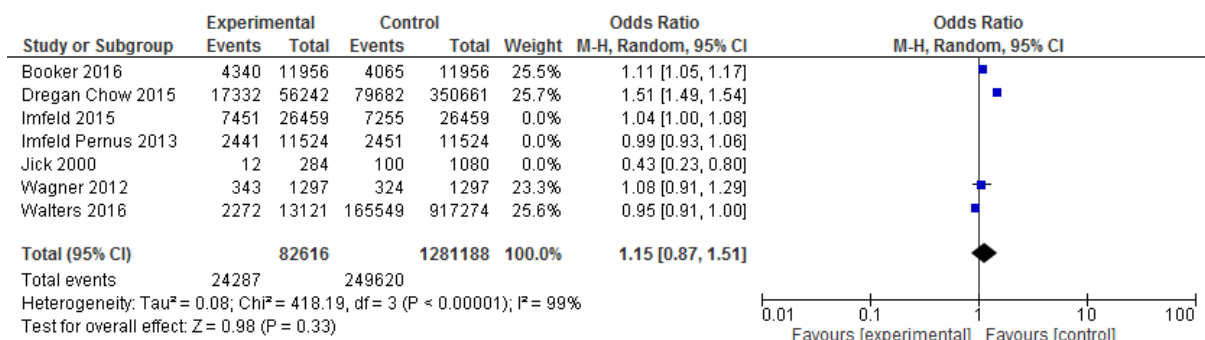

Supplement: pone.0194735.s003.pdf [file pone.0194735.s003.pdf]
