# Supplementary material for: Predicting dementia from primary care records: A systematic review and meta-analysis
Source: PubMed Central journal article supplement (PMC5875793; doi:10.1371/journal.pone.0194735), 2018-03-29

## S2 Figures: Funnel Plots

Figure 1: Funnel plot of comparison: Diabetes, outcome: Dementia NOS.

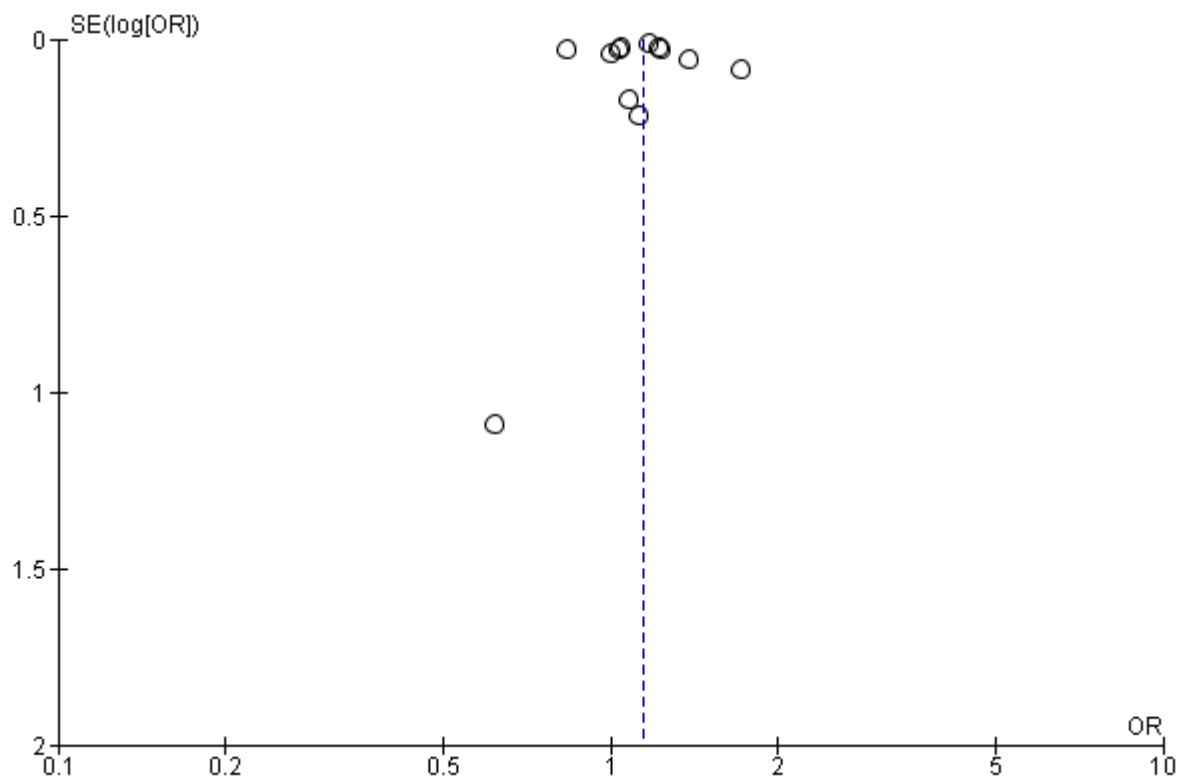

Figure 2: Funnel plot of comparison: Hypertension, outcome: Dementia NOS

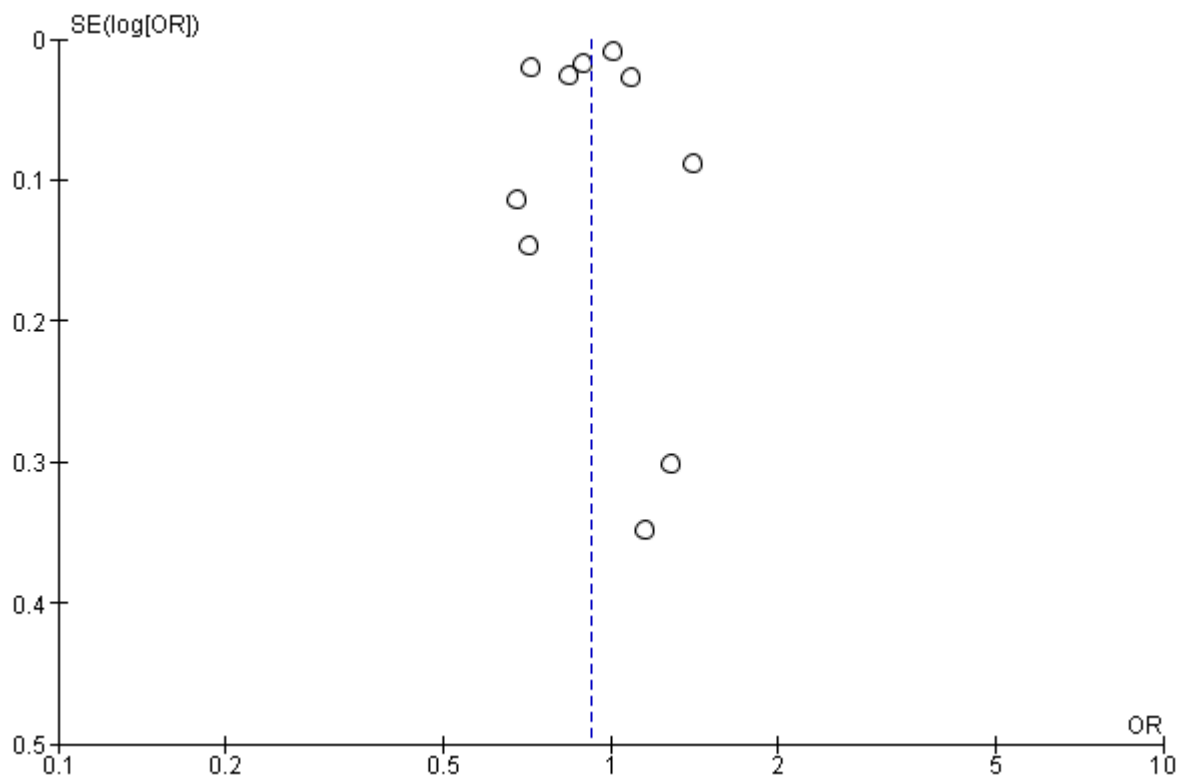

Supplement: pone.0194735.s001.pdf [file pone.0194735.s001.pdf]
