# Supplementary material for: Predicting dementia from primary care records: A systematic review and meta-analysis
Source: PubMed Central journal article supplement (PMC5875793; doi:10.1371/journal.pone.0194735), 2018-03-29
Supplement: pone.0194735.s004.pdf [file pone.0194735.s004.pdf]

| Study                         | Ottawa Newcastle Scale |                                             |                                    |                              | Comparability                   | Exposure                                                |                               |                                        | RoBANS                       |                                                        |                      |               |                           |                       |                         |                    |                         |
|-------------------------------|------------------------|---------------------------------------------|------------------------------------|------------------------------|---------------------------------|---------------------------------------------------------|-------------------------------|----------------------------------------|------------------------------|--------------------------------------------------------|----------------------|---------------|---------------------------|-----------------------|-------------------------|--------------------|-------------------------|
|                               | Case-control Studies   | Selection                                   | 1) case definition validation      | 2) Representativeness        |                                 | 3) selection of controls                                | 4) definition of controls     | 1) Comparability of cases and controls | 1) Ascertainment of Exposure | 2) Same method of ascertainment for cases and controls | 3) Non-response rate | Total N Stars | Selection of participants | Confounding Variables | Measurement of exposure | Outcome assessment | Incomplete outcome data |
| Booker 2016                   |                        |                                             | *                                  | *                            | *                               | **                                                      | *                             | *                                      | *                            |                                                        | 8                    | low risk      | low risk                  | low risk              | low risk                | low risk           | low risk                |
| Burton 2012                   |                        |                                             | *                                  | *                            | *                               | **                                                      | *                             | *                                      | *                            |                                                        | 8                    | low risk      | low risk                  | low risk              | low risk                | low risk           | low risk                |
| Davies 2011                   | *                      |                                             | *                                  | *                            | *                               | **                                                      | *                             | *                                      | *                            |                                                        | 8                    | low risk      | low risk                  | low risk              | low risk                | low risk           | low risk                |
| Dregan 2015 anti-inflam drugs |                        |                                             | *                                  | *                            | *                               | **                                                      | *                             | *                                      | *                            |                                                        | 8                    | low risk      | low risk                  | low risk              | low risk                | low risk           | low risk                |
| Dunn 2005 Lithium             | *                      |                                             | *                                  | *                            | *                               | *                                                       | *                             | *                                      | *                            |                                                        | 8                    | low risk      | unclear risk              | low risk              | low risk                | low risk           | low risk                |
| Dunn 2005 Infectious I*       | *                      |                                             | *                                  | *                            | *                               | **                                                      | *                             | *                                      | *                            |                                                        | 9                    | low risk      | low risk                  | low risk              | low risk                | low risk           | low risk                |
| Imfeld 2012                   | *                      |                                             | *                                  | *                            | *                               | **                                                      | *                             | *                                      | *                            |                                                        | 9                    | low risk      | low risk                  | low risk              | low risk                | low risk           | low risk                |
| Imfeld 2013 Seizures          | *                      |                                             | *                                  | *                            | *                               | **                                                      | *                             | *                                      | *                            |                                                        | 9                    | low risk      | low risk                  | low risk              | low risk                | low risk           | low risk                |
| Imfeld 2013 Epidemiol*        | *                      |                                             | *                                  | *                            | *                               | **                                                      | *                             | *                                      | *                            |                                                        | 9                    | low risk      | low risk                  | low risk              | low risk                | low risk           | low risk                |
| Imfeld 2015                   | *                      |                                             | *                                  | *                            | *                               | **                                                      | *                             | *                                      | *                            |                                                        | 9                    | low risk      | low risk                  | low risk              | low risk                | low risk           | low risk                |
| Imfeld 2016                   | *                      |                                             | *                                  | *                            | *                               | **                                                      | *                             | *                                      | *                            |                                                        | 9                    | low risk      | low risk                  | low risk              | low risk                | low risk           | low risk                |
| Jick 2000                     | *                      |                                             | *                                  | *                            | *                               | **                                                      | *                             | *                                      | *                            |                                                        | 8                    | unclear risk  | low risk                  | low risk              | low risk                | low risk           | low risk                |
| Ramakers 2007                 |                        |                                             | *                                  | *                            | *                               | **                                                      | *                             | *                                      | *                            |                                                        | 8                    | low risk      | low risk                  | low risk              | low risk                | low risk           | low risk                |
| Seshadri 2001                 | *                      |                                             | *                                  | *                            | *                               | **                                                      | *                             | *                                      | *                            |                                                        | 8                    | low risk      | low risk                  | low risk              | low risk                | low risk           | low risk                |
| Wagner 2012                   |                        |                                             | *                                  | *                            | *                               | **                                                      | *                             | *                                      | *                            |                                                        | 8                    | low risk      | low risk                  | low risk              | low risk                | low risk           | low risk                |
| Cohort studies                | Selection              | 1) Representativeness of the exposed cohort | 2) Selection of non-exposed cohort | 3) ascertainment of exposure | 4) outcome not present at start | Comparability of cohorts on basis of design or analysis | Outcome Assessment of outcome | Follow up long enough >10 years        | Adequacy of follow up        | Total                                                  |                      |               |                           |                       |                         |                    |                         |
| Buntinx 1996                  | *                      |                                             | *                                  | *                            | *                               | **                                                      | *                             |                                        | *                            |                                                        | 8                    | low risk      | low risk                  | low risk              | low risk                | low risk           | low risk                |
| Dregan 2015 inflamm:*         | *                      |                                             | *                                  | *                            | *                               | **                                                      | *                             |                                        | *                            |                                                        | 8                    | low risk      | low risk                  | low risk              | low risk                | low risk           | low risk                |
| Kessing 2008                  | *                      |                                             | *                                  | *                            | *                               | **                                                      | *                             |                                        | *                            |                                                        | 7                    | low risk      | low risk                  | low risk              | low risk                | low risk           | low risk                |
| Koehler 2015                  | *                      |                                             | *                                  | *                            | *                               | **                                                      | *                             | *                                      | *                            |                                                        | 9                    | low risk      | low risk                  | low risk              | low risk                | low risk           | low risk                |
| Walters 2016                  | *                      |                                             | *                                  | *                            | *                               | *                                                       | *                             |                                        | *                            |                                                        | 8                    | low risk      | unclear risk              | low risk              | low risk                | low risk           | low risk                |
